# Supplementary material for: Light-Emitting-Diode-Assisted, Fungal-Pigment-Mediated Biosynthesis of Silver Nanoparticles and Their Antibacterial Activity
Source: Polymers (Basel). 2022 Aug 1;14(15):3140. doi: 10.3390/polym14153140 (PMC9370687; doi:10.3390/polym14153140)
Supplement: Supplementary file 1 [file polymers-14-03140-s001.zip › polymers-1747689 supplementary.pdf]

# Supplementary Materials: Light-Emitting-Diode-Assisted, Fungal-Pigment-Mediated Biosynthesis of Silver Nanoparticles and Their Antibacterial Activity

Nobchulee Nuanaon <sup>1</sup>, Sharad Bhatnagar <sup>2</sup>, Tatsuya Motoike <sup>3</sup>, and Hideki Aoyagi <sup>1,2,\*</sup>

<sup>1</sup> Life Science and Bioengineering, Graduate School of Life and Environmental Sciences,  
University of Tsukuba, 1-1-1, Tennodai, Tsukuba 305-8572, Ibaraki, Japan;  
n.nobchulee@gmail.com

<sup>2</sup> Faculty of Life and Environmental Sciences, University of Tsukuba, 1-1-1, Tennodai,  
Tsukuba 305-8572, Ibaraki, Japan; sharad.bhatnagar88@gmail.com

<sup>3</sup> Management Headquarters, Ushio Lighting Inc., Hatchobori, Chuo-ku, Tokyo 104-  
0032, Japan; t-motoike@ushiolighting.co.jp

\* Correspondence: aoyagi.hideki.ge@u.tsukuba.ac.jp

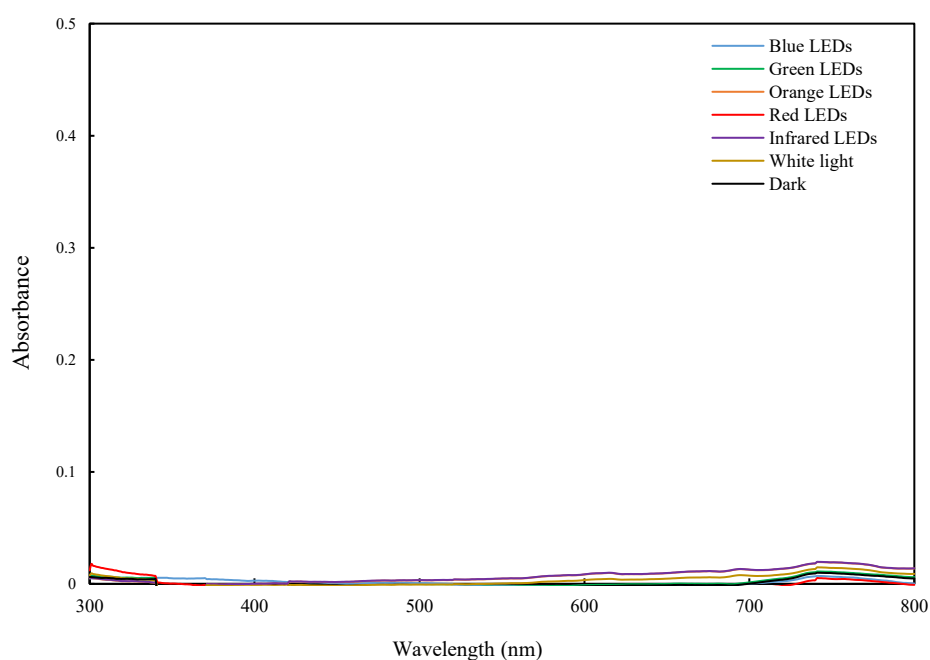

**Figure S1.** UV-vis spectrum of AgNO<sub>3</sub> in the absence of *T. purpurogenus* extracellular pigment exposed to different LEDs light at 24 h.

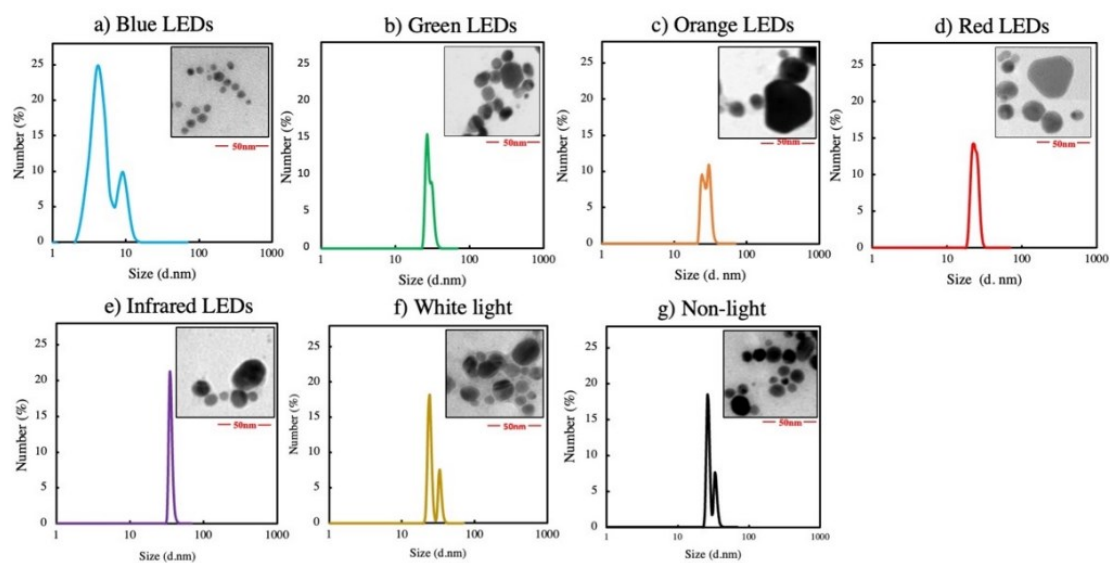

**Figure S2.** (a–g) Dynamic light scattering (DLS) and transmission electron microscopy (TEM) analysis of *T. purpurogenus* extracellular pigment-mediated AgNP biosynthesis by light exposure at different wavelengths for 24 h.

**a) Antimicrobial Activity against of *S. aureus***

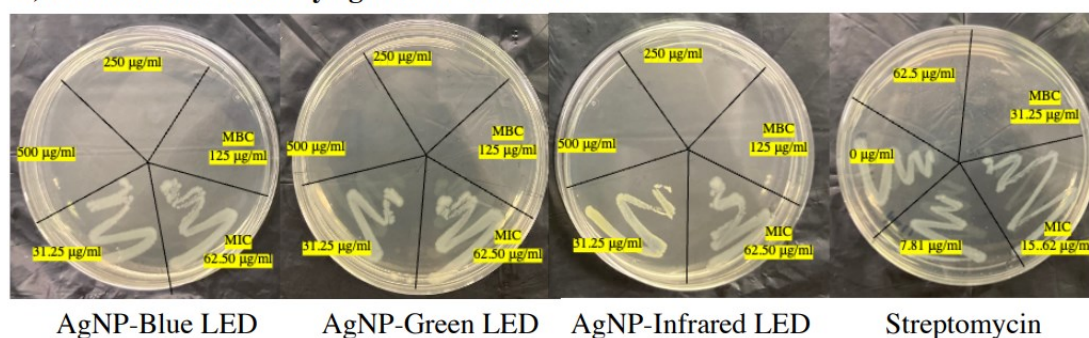

**b) Antimicrobial Activity against of *E. coli***

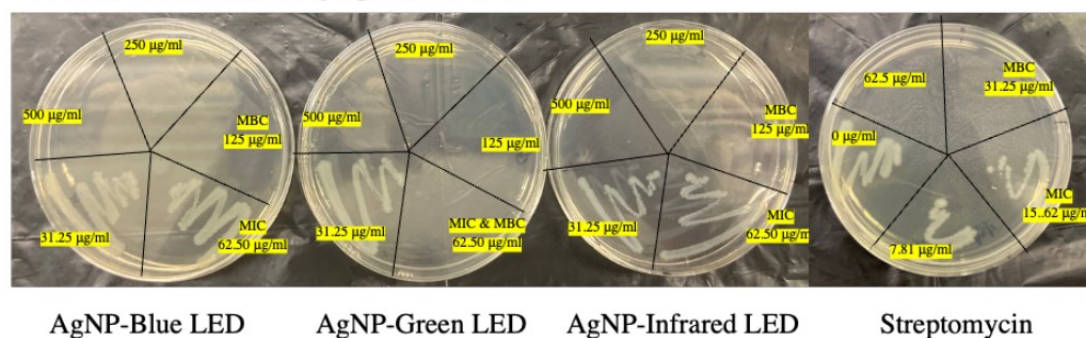

**Figure S3.** Minimum bactericidal concentration (MBC) of biosynthesized AgNPs and streptomycin against (a) *S. aureus* and (b) *E. coli*.

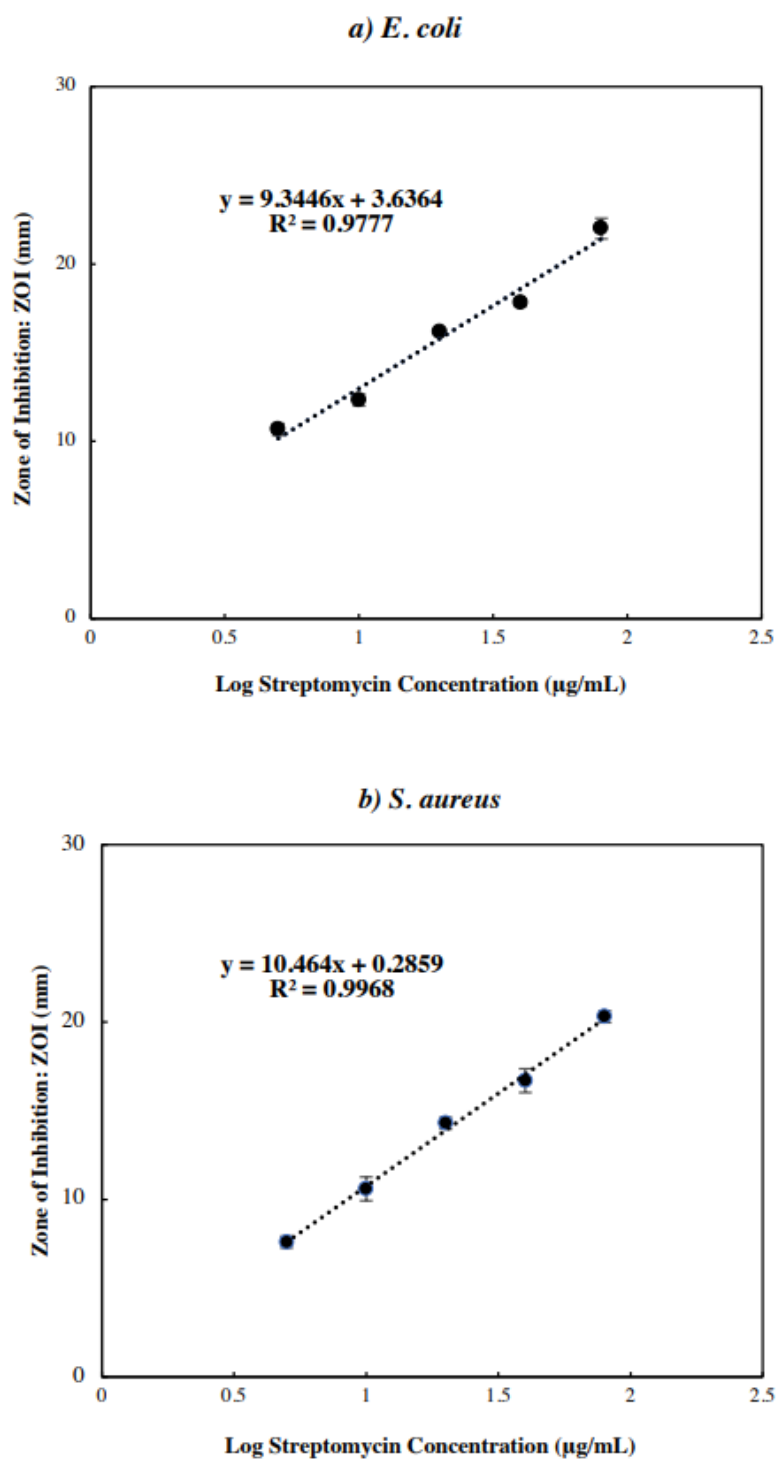

**Figure S4.** Correlation graph of logarithm streptomycin concentration and zone of inhibition against (a) *E. coli* and (b) *S. aureus*. Data are expressed as the means  $\pm$ SE (n = 3 replicates).
